# Supplementary material for: Cantharidin Induces Apoptosis and Promotes Differentiation of AML Cells Through Nuclear Receptor Nur77-Mediated Signaling Pathway
Source: PubMed Central journal article supplement (PMC7485522; doi:10.3389/fphar.2020.01321), 2020-08-28
Supplement: Image_1.pdf [file Image_1.pdf]

# **Cantharidin induces apoptosis and promotes differentiation of AML cells through nuclear receptor Nur77-mediated signaling pathway**

**Zanyang Yu<sup>1</sup>, Li Li<sup>1</sup>, Chengqiang Wang<sup>1</sup>, Hui He<sup>1</sup>, Gen Liu<sup>1</sup>, Haoyue Ma<sup>1</sup>,  
Lei Pang<sup>1</sup>, Mingdong Jiang<sup>2</sup>, Qianwei Lu<sup>2</sup>, Pan Li<sup>2</sup>, Hongyi Qi<sup>1\*</sup>**

<sup>1</sup>College of Pharmaceutical Sciences, Southwest University, 2 Tiansheng Road,  
Beibei District, Chongqing 400716, China

<sup>2</sup>Radiotherapy Department, Chongqing Ninth People's Hospital, Jialing village 69, 10  
Beibei District, Chongqing 400700, China

**\* Correspondence:**

Corresponding Author

Prof. H.Q, College of Pharmaceutical Sciences, Southwest University, 2 Tiansheng  
Road, Beibei District, Chongqing 400716, China

E-mail: [hongyiqi@swu.edu.cn](mailto:hongyiqi@swu.edu.cn).

Tel/Fax: +86 23 68251225.

-- Supplementary Fig.1.

**A**

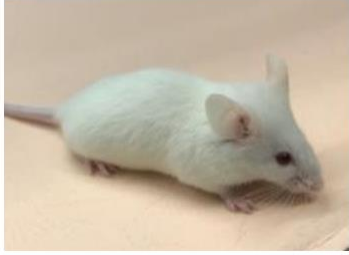

**B**

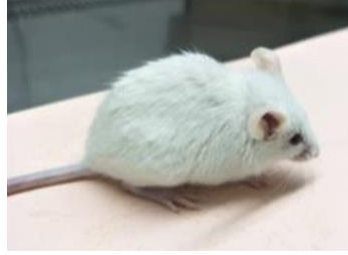

**Supplementary Fig.1.** (A) The physical status of the normal mice. (B) The physical status of the mice two days after modeling.
